# Supplementary material for: PUFAs, BDNF and lipoxin A4 inhibit chemical-induced cytotoxicity of RIN5F cells in vitro and streptozotocin-induced type 2 diabetes mellitus in vivo
Source: PubMed Central journal article supplement (PMC7159172; doi:10.1186/s12944-019-1164-7), 2019-12-10

(A)

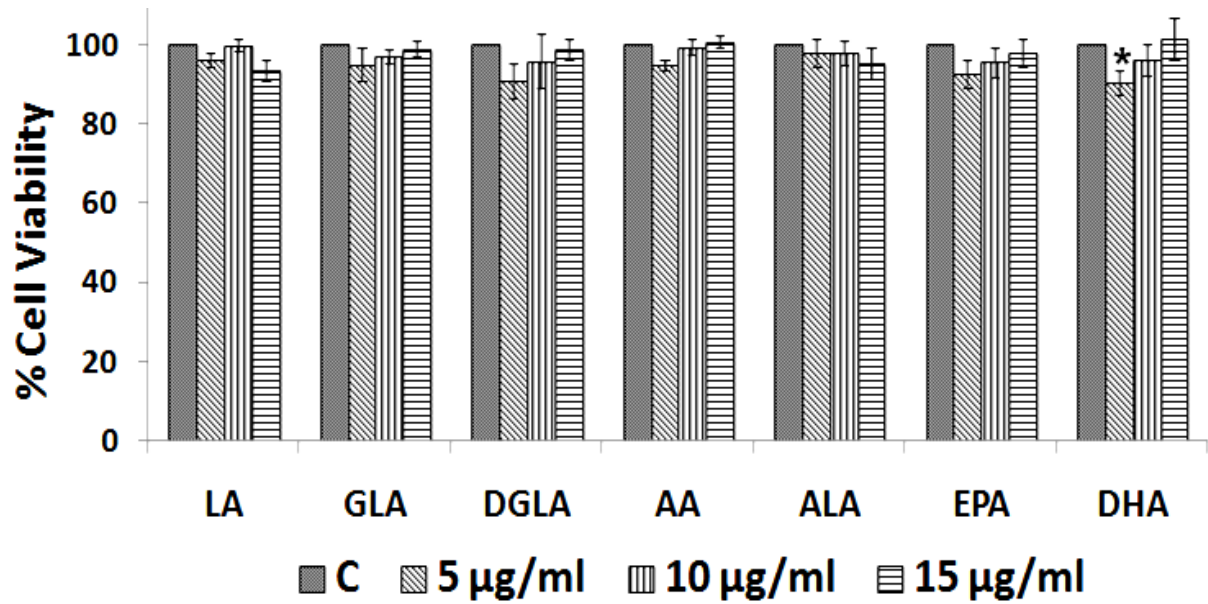

(B)

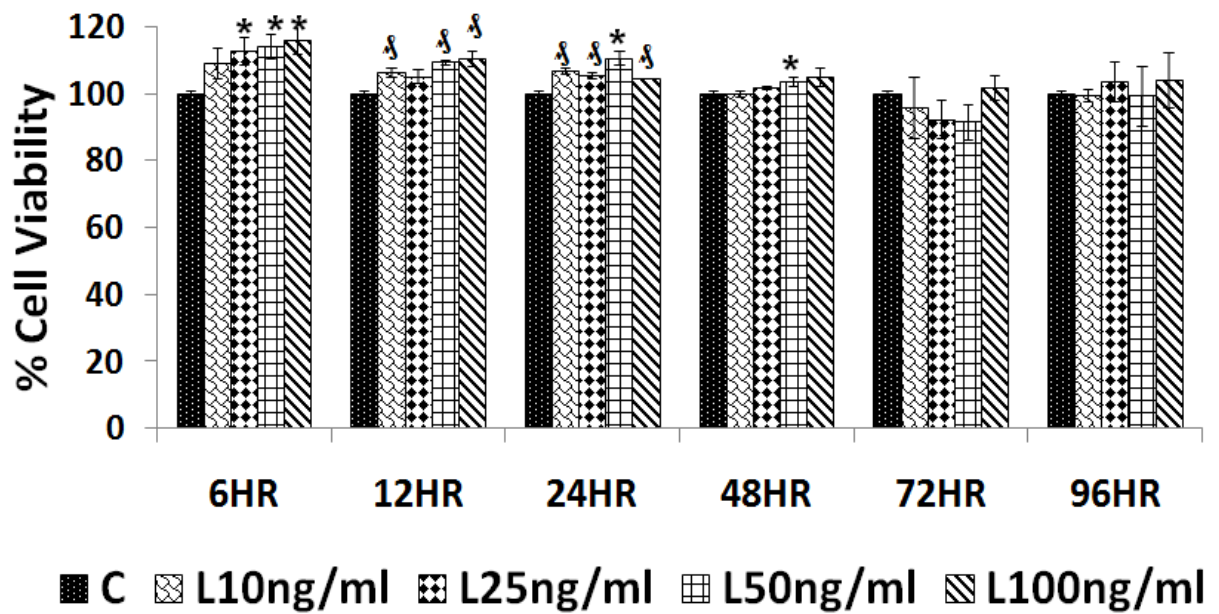

Supplement: 12944_2019_1164_MOESM3_ESM.pdf [file 12944_2019_1164_MOESM3_ESM.pdf]
